# Supplementary material for: Carbon Nanofibers Based on Potassium Citrate/Polyacrylonitrile for Supercapacitors
Source: MDPI journal article supplement (doi:10.3390/membranes12030272), 2022-02-27
Supplement: s1 [file s1]

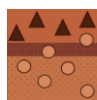

# Supplementary Materials: Carbon Nanofibers Based on Potassium Citrate/Polyacrylonitrile for Supercapacitors

Wang Zhang <sup>1,2</sup>, Ludan Zhang <sup>1</sup>, Junqiang Guo <sup>1</sup>, Jeongyeon Lee <sup>3</sup>, Liwei Lin <sup>2,\*</sup> and Guowang Diao <sup>1,\*</sup>

<sup>1</sup> School of Chemistry and Chemical Engineering, Yangzhou University, Yangzhou 225009, China; zhangwang@yzu.edu.cn (W.Z.); zhangludan01@163.com (L.Z.); guobyxg@hotmail.com (J.G.)

<sup>2</sup> Department of Applied Bioengineering, Graduate School of Convergence Science and Technology, Seoul National University, Suwon-si 16229, Korea

<sup>3</sup> Institute of Textiles Clothing, Faculty of Applied Science and Textiles, The Hong Kong Polytechnic University, Hung Hom, Hong Kong SAR 999077, China; jaden-jy.lee@polyu.edu.hk

\* Correspondence: lin-official@snu.ac.kr (L.L.); gwdiao@yzu.edu.cn (G.D.)

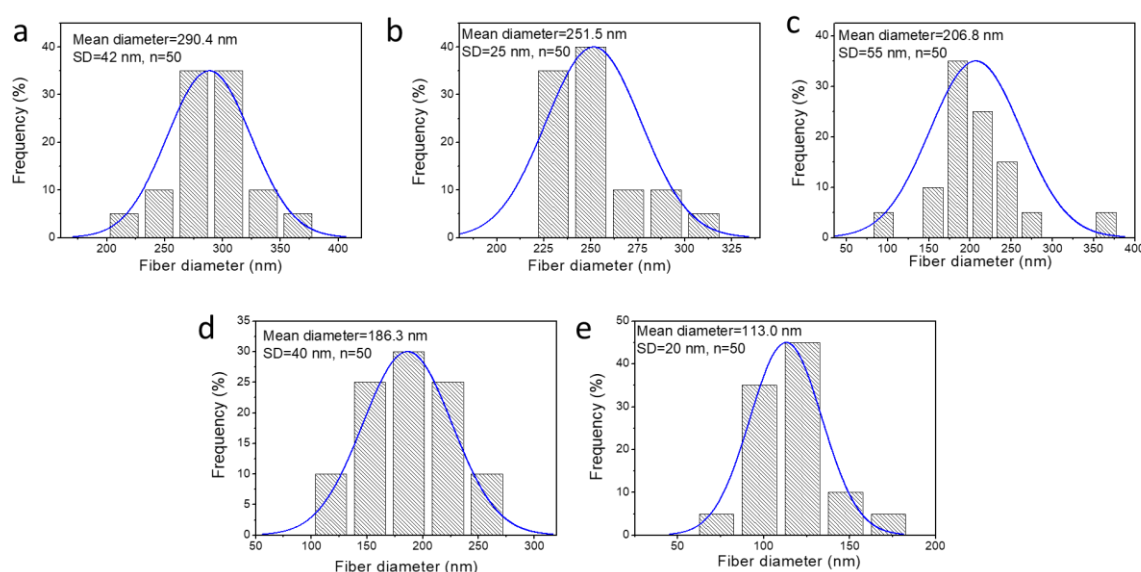

**Figure S1.** the fiber average diameter and distributions determined by SEM image analysis (Figure 2).

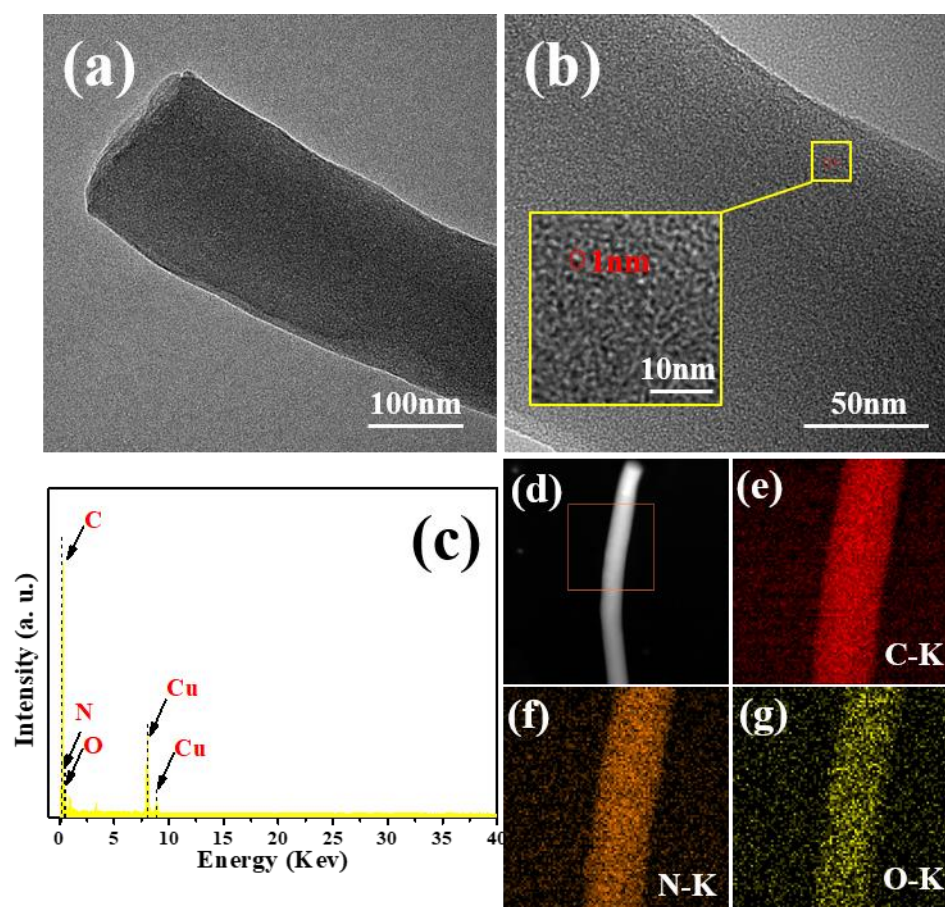

**Figure S2.** C-1 nanofiber of (a, b) HRTEM image, (c) EDS data, (d-g) element mapping.

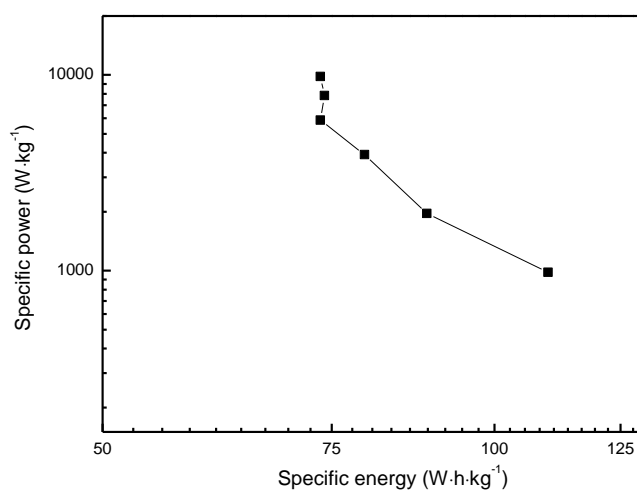

**Figure S3.** Ragone plots related to specific energy and specific power of C-1.

**Table S1.** Comparison of the specific capacitance of some related materials in the literature.

| Sample                               | Specific Capacitance (F·g <sup>-1</sup> ) | Potential Range (V) | Electrolyte                        | Current Density (A·g <sup>-1</sup> ) | Reference |
|--------------------------------------|-------------------------------------------|---------------------|------------------------------------|--------------------------------------|-----------|
| carbon nanofiber                     | <b>404</b>                                | 0—1.0               | 1 M H <sub>2</sub> SO <sub>4</sub> | 1.0                                  | our work  |
| N-doped porous carbon nanosheets     | 350                                       | -1.0—0              | 6 M KOH                            | 1.0                                  | [1]       |
| porous carbon/carbon cloth           | 379.5                                     | -1.0—0              | 6 M KOH                            | 1.0                                  | [2]       |
| activated hierarchical porous carbon | 318                                       | -1.0—0              | 6 M KOH                            | 1.0                                  | [3]       |
| GO/CNT/Pani                          | 294                                       | -0.2—0.8            | 5 M KOH                            | 0.1                                  | [4]       |

## Reference

- [1] D. Kim, X. Jin, Y. Cho, J. Lim, B. Yan, D. Ko, D.K. Kim, Y. Piao, Facile preparation of N-doped porous carbon nanosheets derived from potassium citrate/melamine for high-performance supercapacitors, *Journal of Electroanalytical Chemistry*, 892 (2021) 115302.
- [2] M. Jang, D. Ko, Y. Choi, B. Yan, X. Jin, D.K. Kim, Y. Piao, Self-organized hierarchically porous carbon coated on carbon cloth for high-performance freestanding supercapacitor electrodes, *Journal of Electroanalytical Chemistry*, 895 (2021) 115456.
- [3] K.-d. Seong, X. Jin, D. Kim, J.M. Kim, D. Ko, Y. Cho, M. Hwang, J.-H. Kim, Y. Piao, Ultrafast and scalable microwave-assisted synthesis of activated hierarchical porous carbon for high-performance supercapacitor electrodes, *Journal of Electroanalytical Chemistry*, 874 (2020) 114464.
- [4] E.H. Jo, H.D. Jang, H. Chang, S.K. Kim, J.-H. Choi, C.M. Lee, 3 D Network-Structured Crumpled Graphene/Carbon Nanotube/Polyaniline Composites for Supercapacitors, *ChemSusChem*, 10 (2017) 2210-2217..
